# Supplementary material for: Heart Rate Variability Monitoring During Strength and High-Intensity Interval Training Overload Microcycles
Source: Front Physiol. 2019 May 22;10:582. doi: 10.3389/fphys.2019.00582 (PMC6538885; doi:10.3389/fphys.2019.00582)
Supplement: Table 1.xlsx — Supplementary Tables. [file Table_1.xlsx]

## Sheet: S-Tab1_d_perform-HR(V)_ST
Supplementary Table 1
Performance and heart rate (variability) measures at Pre, Post1, Post4 and changes between testing days for the strength training microcycle (7 female, 12 male). Heart rate (variability) measures are provided as single-day values and 2–4-day rolling averages.
											∆ Pre to Post1													∆ Post1 to Post4													∆ Pre to Post4
	Pre			Post1			Post4				∆	±	SD	90% CL		dpre	90% CL		ddiff	90% CL		pbonf		∆	±	SD	90% CL		dpre	90% CL		ddiff	90% CL		pbonf		∆	±	SD	90% CL		dpre	90% CL		ddiff	90% CL		pbonf
	mean	±	SD	mean	±	SD	mean	±	SD					LL	UL		LL	UL		LL	UL						LL	UL		LL	UL		LL	UL						LL	UL		LL	UL		LL	UL
1RM squat (kg)
female	69.0714	±	11.5853	66.9286	±	11.9851	71.5286	±	15.5767
male	117.208	±	23.3196	111.425	±	23.8048	115.142	±	20.2624
overall	99.4737	±	30.7602	95.0316	±	29.6728	99.0737	±	28.2659		-4.4421	±	8.55962	-7.8473	-1.0369	-0.138309	-0.244333	-0.0322848	-0.519	-0.9153	-0.1094	0.1089		4.0421	±	7.60192	1.0179	7.0663	0.125854	0.0316932	0.220016	0.5317	0.1208	0.9291	0.0973		-0.4	±	9.87893	-4.3301	3.5301	-0.0124544	-0.134822	0.109913	-0.0405	-0.4174	0.3376	1
MVIC squat (N)
female	951.571	±	119.96	912	±	80.5538	944.571	±	123.617
male	1631.78	±	413.014	1681.12	±	370.101	1705.12	±	419.175
overall	1381.17	±	471.89	1397.76	±	480.795	1424.92	±	504.524		16.5895	±	187.209	-57.8864	91.0653	0.03367	-0.117486	0.184826	0.0886	-0.2907	0.4655	1		27.1579	±	191.312	-48.9503	103.266	0.0551195	-0.0993493	0.209588	0.142	-0.2393	0.5193	1		43.7474	±	104.58	2.1413	85.3516	0.0887895	0.00434597	0.173229	0.4183	0.0187	0.807	0.2547
1RM bench (kg)
female	41.8571	±	5.6196	41.9286	±	6.6558	43.2714	±	7.4558
male	96.175	±	16.1228	94.225	±	17.8418	97.3833	±	16.6914
overall	76.1632	±	29.9006	74.9579	±	29.6822	77.4474	±	30.1325		-1.2053	±	3.20598	-2.4807	0.0701	-0.038607	-0.0794593	0.00224537	-0.3759	-0.762	0.02	0.3559		2.4895	±	3.1892	1.2207	3.7582	0.0797412	0.0391003	0.120379	0.7806	0.3383	1.2044	0.0095		1.2842	±	4.09135	-0.3434	2.9118	0.0411342	-0.0109994	0.0932679	0.3139	-0.0772	0.6966	0.5643
MVIC bench (N)
female	562.343	±	51.9808	538.786	±	58.9434	555.5	±	62.3645
male	1209.75	±	197.32	1163.54	±	217.254	1191.17	±	233.854
overall	971.232	±	357.267	933.368	±	354.782	956.974	±	366.009		-37.8632	±	54.1242	-59.3949	-16.3314	-0.101502	-0.159223	-0.0437805	-0.6996	-1.1137	-0.2684	0.0207		23.6053	±	37.2427	8.7893	38.4212	0.06328	0.023562	0.102998	0.6338	0.2111	1.0409	0.0385		-14.2579	±	62.9127	-39.2859	10.7701	-0.0382219	-0.105316	0.028872	-0.2266	-0.6059	0.1588	1
Supine recordings
HR (bpm)
single-day	60.1947	±	8.1906	63.6105	±	8.982	60.7211	±	7.4127		3.4158	±	7.38017	0.4798	6.3518	0.399418	0.0561042	0.742731	0.4628	0.059	0.8547	0.1764		-2.8895	±	6.75425	-5.5765	-0.2025	-0.337876	-0.652074	-0.0236788	-0.4278	-0.8171	-0.0273	0.2358		0.5263	±	4.40591	-1.2264	2.2791	0.0615415	-0.143406	0.266501	0.1195	-0.2609	0.4966	1
2-day avg	60.8211	±	8.0273	63.8368	±	8.531	60.5158	±	7.183		3.0158	±	5.99641	0.6303	5.4013	0.359819	0.0752018	0.644435	0.5029	0.0951	0.8979	0.1252		-3.3211	±	4.84282	-5.2476	-1.3945	-0.396244	-0.626097	-0.166379	-0.6858	-1.0984	-0.2564	0.0236		-0.3053	±	4.0696	-1.9242	1.3137	-0.0364257	-0.229579	0.156739	-0.075	-0.4519	0.3039	1
3-day avg	60.5737	±	7.2636	63.8789	±	7.7243	60.8368	±	7.1408		3.3053	±	4.72916	1.4239	5.1866	0.435822	0.187749	0.683882	0.6989	0.2678	1.113	0.0208		-3.0421	±	3.49497	-4.4325	-1.6517	-0.401118	-0.58445	-0.217786	-0.8704	-1.306	-0.4149	0.004		0.2632	±	3.54059	-1.1454	1.6717	0.0347044	-0.151027	0.220423	0.0743	-0.3046	0.4512	1
4-day avg	60.1579	±	6.6104	63.6421	±	7.5874	61.6053	±	7.3168		3.4842	±	3.96698	1.9061	5.0624	0.504808	0.276165	0.733465	0.8783	0.4215	1.3149	0.0037		-2.0368	±	1.59311	-2.6706	-1.4031	-0.295101	-0.386929	-0.203288	-1.2785	-1.779	-0.7524	< .001		1.4474	±	3.57077	0.0268	2.8679	0.209706	0.00388291	0.415515	0.4053	0.0069	0.7932	0.2826
Ln RMSSD (ms)
single-day	4.3229	±	0.4526	4.0812	±	0.6126	4.2031	±	0.4642		-0.2418	±	0.42357	-0.4103	-0.0733	-0.511673	-0.868235	-0.15511	-0.5708	-0.9717	-0.1555	0.0686		0.1219	±	0.449796	-0.057	0.3009	0.257952	-0.120618	0.636734	0.2711	-0.117	0.652	0.758		-0.1198	±	0.273957	-0.2288	-0.0109	-0.253509	-0.484163	-0.0230655	-0.4374	-0.8274	-0.036	0.2179
2-day avg	4.2818	±	0.4795	4.0644	±	0.5687	4.2264	±	0.465		-0.2174	±	0.29801	-0.336	-0.0989	-0.434232	-0.671122	-0.197541	-0.7296	-1.1472	-0.2944	0.0156		0.1619	±	0.300687	0.0423	0.2816	0.323377	0.0844894	0.562464	0.5386	0.1269	0.9366	0.0916		-0.0555	±	0.248929	-0.1545	0.0436	-0.110855	-0.308596	0.087086	-0.2228	-0.602	0.1624	1
3-day avg	4.3025	±	0.4842	4.0805	±	0.5366	4.2217	±	0.4465		-0.222	±	0.22631	-0.312	-0.132	-0.439115	-0.617135	-0.261096	-0.981	-1.4324	-0.5078	0.0014		0.1412	±	0.243709	0.0443	0.2382	0.279293	0.0876253	0.471159	0.5794	0.1632	0.9811	0.0634		-0.0808	±	0.176772	-0.1511	-0.0105	-0.159822	-0.298875	-0.020769	-0.457	-0.8484	-0.0538	0.1852
4-day avg	4.3102	±	0.4647	4.0911	±	0.5084	4.1824	±	0.4719		-0.2191	±	0.183983	-0.2922	-0.1459	-0.451565	-0.602224	-0.3007	-1.1906	-1.6757	-0.6809	< .001		0.0913	±	0.106105	0.0491	0.1335	0.188169	0.101195	0.275143	0.8606	0.4066	1.2948	0.0044		-0.1277	±	0.124239	-0.1772	-0.0783	-0.26319	-0.365209	-0.161376	-1.0282	-1.4867	-0.5472	< .001
Ln RMSSD/RR (x10³)
single-day	4.2429	±	0.4525	4.2218	±	0.5307	4.1597	±	0.4357		-0.0211	±	0.479397	-0.2118	0.1696	-0.0446596	-0.448289	0.35897	-0.044	-0.421	0.3341	1		-0.0621	±	0.290857	-0.1778	0.0536	-0.131439	-0.376326	0.113448	-0.2135	-0.5924	0.1712	1		-0.0832	±	0.410828	-0.2466	0.0802	-0.176098	-0.521945	0.169749	-0.2025	-0.5811	0.1816	1
2-day avg	4.2419	±	0.4247	4.2256	±	0.5092	4.1705	±	0.4067		-0.0163	±	0.382299	-0.1683	0.1358	-0.0367583	-0.379536	0.306244	-0.0425	-0.4195	0.3356	1		-0.0551	±	0.222691	-0.1437	0.0335	-0.124257	-0.32406	0.0755463	-0.2475	-0.6274	0.1392	0.885		-0.0714	±	0.269096	-0.1784	0.0357	-0.161015	-0.402312	0.0805075	-0.2652	-0.6458	0.1226	0.7883
3-day avg	4.2476	±	0.4139	4.2465	±	0.4567	4.1873	±	0.3915		-0.0011	±	0.270844	-0.1088	0.1067	-0.00254535	-0.251758	0.246899	-0.0039	-0.3812	0.3735	1		-0.0593	±	0.172425	-0.1279	0.0093	-0.137218	-0.295955	0.0215198	-0.3437	-0.7279	0.0496	0.4543		-0.0603	±	0.241659	-0.1565	0.0358	-0.139532	-0.362134	0.0828396	-0.2496	-0.6296	0.1372	0.8729
4-day avg	4.2267	±	0.3852	4.2389	±	0.4406	4.1953	±	0.4129		0.0122	±	0.259711	-0.0911	0.1155	0.0303336	-0.226508	0.287175	0.047	-0.3312	0.4239	1		-0.0436	±	0.117897	-0.0905	0.0033	-0.108405	-0.225016	0.00820499	-0.3701	-0.7557	0.0254	0.3723		-0.0314	±	0.247682	-0.13	0.0671	-0.0780718	-0.323227	0.166835	-0.1269	-0.5041	0.2538	1
Standing recording
HR (bpm)
single-day	83.2579	±	9.8282	82.5684	±	10.3105	85.2105	±	10.7055		-0.6895	±	11.3712	-5.2132	3.8342	-0.067191	-0.50802	0.373638	-0.0606	-0.4375	0.3179	1		2.6421	±	10.695	-1.6126	6.8968	0.25747	-0.157146	0.672085	0.247	-0.1396	0.627	0.8873		1.9526	±	8.07763	-1.2608	5.1661	0.190279	-0.122863	0.50343	0.2417	-0.1446	0.6215	0.9179
2-day avg	82.5895	±	9.0271	82.1895	±	7.854	83.4526	±	9.0003		-0.4	±	5.69561	-2.6658	1.8658	-0.0424387	-0.282833	0.197955	-0.0702	-0.4471	0.3086	1		1.2632	±	7.14627	-1.5798	4.1061	0.134021	-0.167612	0.435644	0.1768	-0.2061	0.5547	1		0.8632	±	5.26901	-1.233	2.9593	0.0915828	-0.130817	0.313972	0.1638	-0.2184	0.5416	1
3-day avg	82.2158	±	8.8659	82.2737	±	8.1118	82.5474	±	8.4124		0.0579	±	4.99047	-1.9274	2.0432	0.0062547	-0.208209	0.220718	0.0116	-0.3659	0.3888	1		0.2737	±	5.02802	-1.7266	2.2739	0.0295667	-0.186517	0.24564	0.0544	-0.324	0.4313	1		0.3316	±	4.50901	-1.4622	2.1254	0.0358214	-0.157955	0.229598	0.0735	-0.3054	0.4504	1
4-day avg	81.6474	±	8.6243	82.3158	±	8.2404	82.5632	±	8.2246		0.6684	±	4.91269	-1.286	2.6228	0.0742272	-0.142813	0.291267	0.1361	-0.245	0.5134	1		0.2474	±	3.65747	-1.2077	1.7024	0.0274743	-0.134118	0.189055	0.0676	-0.3111	0.4445	1		0.9158	±	4.75105	-0.9743	2.8059	0.101701	-0.108198	0.311601	0.1928	-0.1909	0.5711	1
Ln RMSSD (ms)
single-day	3.4051	±	0.4629	3.3147	±	0.6362	3.2153	±	0.5193		-0.0903	±	0.428291	-0.2607	0.0801	-0.186832	-0.539392	0.165728	-0.2109	-0.5897	0.1737	1		-0.0995	±	0.446329	-0.277	0.0781	-0.205867	-0.573117	0.16159	-0.2229	-0.602	0.1624	1		-0.1898	±	0.336468	-0.3236	-0.0559	-0.392699	-0.669533	-0.115658	-0.5641	-0.9643	-0.1495	0.0729
2-day avg	3.3709	±	0.492	3.3453	±	0.5109	3.2715	±	0.5165		-0.0257	±	0.191233	-0.1018	0.0504	-0.0500286	-0.198168	0.0981106	-0.1343	-0.5116	0.2466	1		-0.0738	±	0.288236	-0.1885	0.0409	-0.143662	-0.366941	0.0796175	-0.256	-0.6363	0.1312	0.8374		-0.0995	±	0.29004	-0.2149	0.0159	-0.193691	-0.418333	0.0309516	-0.343	-0.7271	0.0503	0.4568
3-day avg	3.3744	±	0.523	3.3496	±	0.5532	3.3143	±	0.5237		-0.0248	±	0.176345	-0.0949	0.0454	-0.0454151	-0.173786	0.083139	-0.1406	-0.5179	0.2406	1		-0.0354	±	0.214536	-0.1207	0.05	-0.0648264	-0.221033	0.0915628	-0.1649	-0.5426	0.2174	1		-0.0602	±	0.236375	-0.1542	0.0339	-0.110242	-0.28238	0.0620796	-0.2545	-0.6347	0.1326	0.8456
4-day avg	3.405	±	0.5213	3.3458	±	0.5432	3.3142	±	0.5341		-0.0592	±	0.173185	-0.1281	0.0097	-0.108764	-0.235349	0.0178211	-0.3419	-0.726	0.0513	0.4604		-0.0316	±	0.147298	-0.0902	0.027	-0.0580564	-0.165718	0.0496051	-0.2144	-0.5933	0.1704	1		-0.0908	±	0.258898	-0.1938	0.0122	-0.16682	-0.356055	0.0224142	-0.3507	-0.7353	0.0432	0.4313
Ln RMSSD/RR (x10³)
single-day	4.6156	±	0.5054	4.4432	±	0.5989	4.4581	±	0.5432		-0.1725	±	0.49583	-0.3697	0.0248	-0.326892	-0.700591	0.0469967	-0.3478	-0.7323	0.0458	0.4405		0.0149	±	0.406063	-0.1466	0.1765	0.0282359	-0.277811	0.334472	0.0368	-0.3412	0.4138	1		-0.1575	±	0.322599	-0.2859	-0.0292	-0.298467	-0.541788	-0.0553348	-0.4883	-0.8821	-0.0819	0.1421
2-day avg	4.5205	±	0.4792	4.4708	±	0.5195	4.4437	±	0.5024		-0.0497	±	0.25628	-0.1516	0.0523	-0.0993322	-0.302993	0.104529	-0.1939	-0.5722	0.1898	1		-0.0272	±	0.250789	-0.1269	0.0726	-0.0543629	-0.253627	0.145101	-0.1083	-0.4853	0.2717	1		-0.0768	±	0.246343	-0.1748	0.0212	-0.153495	-0.349362	0.0423711	-0.3119	-0.6945	0.079	0.5722
3-day avg	4.5007	±	0.5029	4.4726	±	0.5197	4.4499	±	0.5175		-0.0281	±	0.256503	-0.1301	0.0739	-0.053515	-0.247769	0.140739	-0.1096	-0.4866	0.2705	1		-0.0227	±	0.23221	-0.1151	0.0696	-0.043231	-0.219202	0.13255	-0.0979	-0.4749	0.2817	1		-0.0508	±	0.245143	-0.1484	0.0467	-0.0967459	-0.28262	0.0889377	-0.2074	-0.5861	0.177	1
4-day avg	4.5129	±	0.509	4.4732	±	0.5265	4.4481	±	0.5242		-0.0397	±	0.279636	-0.151	0.0715	-0.0747005	-0.284125	0.134536	-0.1421	-0.5195	0.2392	1		-0.0252	±	0.151939	-0.0856	0.0353	-0.0474169	-0.161067	0.0664213	-0.1656	-0.5434	0.2167	1		-0.0649	±	0.304696	-0.1861	0.0563	-0.122117	-0.35017	0.105935	-0.213	-0.5919	0.1717	1
Data are shown as mean ± SD and 90% confidence limits. 1RM: estimated one repetition maximum, MVIC: maximum voluntary isometric contraction, HR: heart rate, Ln RMSSD: natural logarithm of root mean square of successive differences between adjacent beat to beat intervals, Ln RMSSD/RR: Ln RMSSD to R-R interval ratio.
dpre: standardized mean difference using sample-size adjusted, between-subject SD at Pre, ddiff: standardized mean difference using SD of differences, pbonf: Bonferroni adjusted p-vales, 90% CL: 90% condifence limits, LL: lower limit, UL: upper limit.
[truncated: 3 more columns]

## Sheet: S-Tab2_d_perform-HR(V)_HIIT
Supplementary Table 2
Performance and heart rate (variability) measures at Pre, Post1, Post4 and changes between testing days for the high-intensity interval training microcycle (9 female, 9 male). Heart rate (variability) measures are provided as single-day values and 2–4-day rolling averages.
											∆ Pre to Post1													∆ Post1 to Post4													∆ Pre to Post4
	Pre			Post1			Post4				∆	±	SD	90% CL		dpre	90% CL		ddiff	90% CL		pbonf		∆	±	SD	90% CL		dpre	90% CL		ddiff	90% CL		pbonf		∆	±	SD	90% CL		dpre	90% CL		ddiff	90% CL		pbonf
	mean	±	SD	mean	±	SD	mean	±	SD					LL	UL		LL	UL		LL	UL						LL	UL		LL	UL		LL	UL						LL	UL		LL	UL		LL	UL
RSA mean peak velocity (m/s)
female	4.5289	±	0.1898	4.3222	±	0.203	4.5733	±	0.3813
male	5.4922	±	0.3058	5.3433	±	0.2848	5.4422	±	0.2699
overall	5.0106	±	0.5537	4.8328	±	0.5776	5.0078	±	0.55		-0.1778	±	0.129504	-0.2309	-0.1247	-0.306734	-0.398341	-0.215128	-1.3728	-1.9045	-0.8128	< .001		0.175	±	0.232385	0.0797	0.2703	0.301904	0.137496	0.466312	0.7531	0.3023	1.1849	0.0159		-0.0028	±	0.257129	-0.1082	0.1027	-0.00483046	-0.186663	0.177174	-0.0108	-0.3984	0.3771	1
30-15 VIFT (km/h)
female	17.4444	±	1.7756	16.7778	±	1.3489	17.2778	±	2.0632
male	20.2222	±	1.3489	19.3333	±	1.4361	20	±	1.4361
overall	18.8333	±	2.0934	18.0556	±	1.8856	18.6389	±	2.2216		-0.7778	±	0.732084	-1.078	-0.4776	-0.354912	-0.491894	-0.21793	-1.0624	-1.5389	-0.5617	< .001		0.5833	±	0.771744	0.2669	0.8998	0.266161	0.121787	0.410581	0.7559	0.3047	1.188	0.0155		-0.1944	±	0.909733	-0.5675	0.1786	-0.0887052	-0.258952	0.0814956	-0.2137	-0.6029	0.1816	1
Supine recording
HR (bpm)
single-day	58.6222	±	8.2577	57.3667	±	8.7957	55.2833	±	7.7684		-1.2556	±	4.20549	-2.9799	0.4688	-0.145244	-0.344705	0.0542293	-0.2986	-0.6909	0.1023	0.6671		-2.0833	±	4.39723	-3.8863	-0.2803	-0.240989	-0.449555	-0.0324242	-0.4738	-0.8771	-0.0575	0.1817		-3.3389	±	3.20278	-4.6521	-2.0257	-0.386233	-0.53814	-0.234326	-1.0425	-1.5158	-0.5453	0.0011
2-day avg	58.2778	±	8.5014	58.7	±	8.3985	55.3222	±	7.6475		0.4222	±	2.9385	-0.7826	1.6271	0.0474387	-0.0879335	0.182822	0.1437	-0.2482	0.5314	1		-3.3778	±	2.64009	-4.4603	-2.2953	-0.379532	-0.501163	-0.257902	-1.2794	-1.7936	-0.7381	< .001		-2.9556	±	2.79079	-4.0999	-1.8113	-0.332094	-0.460668	-0.203519	-1.059	-1.535	-0.5589	< .001
3-day avg	57.5722	±	7.7404	58.85	±	8.5287	55.5778	±	7.7302		1.2778	±	2.95467	0.0663	2.4893	0.15769	0.00818192	0.307198	0.4325	0.0203	0.8326	0.2523		-3.2722	±	1.88892	-4.0467	-2.4977	-0.403814	-0.499393	-0.308235	-1.7323	-2.337	-1.0954	< .001		-1.9944	±	2.68382	-3.0949	-0.894	-0.246124	-0.381934	-0.110326	-0.7431	-1.1737	-0.2937	0.0174
4-day avg	57.4889	±	7.1651	58.9444	±	7.8082	56.0444	±	7.8432		1.4556	±	2.61044	0.3852	2.5259	0.194055	0.0513534	0.336743	0.5576	0.1322	0.9681	0.0904		-2.9	±	1.71499	-3.6032	-2.1968	-0.386617	-0.480365	-0.292869	-1.691	-2.2869	-1.0633	< .001		-1.4444	±	2.43147	-2.4414	-0.4475	-0.192562	-0.325478	-0.059659	-0.5941	-1.008	-0.1643	0.066
Ln RMSSD (ms)
single-day	4.3398	±	0.5893	4.3789	±	0.4612	4.3197	±	0.5135		0.0391	±	0.344874	-0.1024	0.1805	0.063379	-0.165985	0.292581	0.1132	-0.2774	0.5006	1		-0.0592	±	0.312844	-0.1875	0.0691	-0.09596	-0.303928	0.112007	-0.1893	-0.5779	0.2047	1		-0.0202	±	0.307186	-0.1461	0.1058	-0.0327431	-0.23682	0.171496	-0.0656	-0.4528	0.3234	1
2-day avg	4.2598	±	0.6208	4.3018	±	0.5035	4.3766	±	0.4782		0.0421	±	0.230506	-0.0525	0.1366	0.0647792	-0.0807817	0.210186	0.1824	-0.2112	0.5709	1		0.0748	±	0.269363	-0.0357	0.1852	0.115095	-0.0549315	0.284967	0.2776	-0.1218	0.6691	0.7653		0.1168	±	0.304854	-0.0082	0.2418	0.17972	-0.0126173	0.372057	0.3832	-0.0244	0.7802	0.3671
3-day avg	4.2994	±	0.5631	4.2764	±	0.5165	4.3659	±	0.4829		-0.0231	±	0.18402	-0.0985	0.0524	-0.0391861	-0.167092	0.0888896	-0.1253	-0.5127	0.2658	1		0.0895	±	0.227173	-0.0036	0.1826	0.151825	-0.00610692	0.309756	0.394	-0.0146	0.7916	0.3388		0.0664	±	0.217047	-0.0226	0.1554	0.112639	-0.0383379	0.263615	0.3061	-0.0953	0.6988	0.6341
4-day avg	4.3094	±	0.5209	4.2612	±	0.528	4.3692	±	0.4616		-0.0482	±	0.175931	-0.1203	0.024	-0.0883889	-0.220606	0.0440111	-0.2738	-0.6651	0.1253	0.7844		0.108	±	0.21275	0.0208	0.1952	0.19805	0.0381429	0.357957	0.5076	0.0878	0.9137	0.1377		0.0598	±	0.175295	-0.012	0.1317	0.109661	-0.0220055	0.241511	0.3413	-0.0628	0.7358	0.4973
Ln RMSSD/RR (x10³)
single-day	4.1193	±	0.3422	4.1028	±	0.4819	3.9033	±	0.4259		-0.0165	±	0.3955	-0.1787	0.1457	-0.0460584	-0.498827	0.40671	-0.0417	-0.429	0.3468	1		-0.1995	±	0.386801	-0.3581	-0.0409	-0.556888	-0.999607	-0.114169	-0.5158	-0.9225	-0.0951	0.1287		-0.216	±	0.305386	-0.3412	-0.0908	-0.602947	-0.952432	-0.253461	-0.7073	-1.1336	-0.2629	0.0241
2-day avg	4.0134	±	0.375	4.108	±	0.4113	3.9572	±	0.4233		0.0946	±	0.253622	-0.0094	0.1985	0.240971	-0.0239443	0.505632	0.3728	-0.0339	0.7691	0.3964		-0.1508	±	0.237046	-0.248	-0.0536	-0.384127	-0.631721	-0.136533	-0.6363	-1.0546	-0.2013	0.0456		-0.0563	±	0.329	-0.1912	0.0786	-0.143411	-0.487037	0.200215	-0.1711	-0.5592	0.2221	1
3-day avg	4.0136	±	0.3334	4.0889	±	0.3669	3.9609	±	0.4038		0.0753	±	0.228134	-0.0183	0.1688	0.215742	-0.0524313	0.483629	0.33	-0.0732	0.7239	0.5385		-0.128	±	0.20907	-0.2137	-0.0423	-0.366733	-0.612272	-0.121194	-0.6122	-1.0281	-0.1803	0.0563		-0.0527	±	0.276955	-0.1663	0.0608	-0.150991	-0.476466	0.174198	-0.1904	-0.579	0.2037	1
4-day avg	4.0269	±	0.3273	4.0875	±	0.3481	3.9964	±	0.4089		0.0606	±	0.1914	-0.0179	0.139	0.176861	-0.0522411	0.405671	0.3164	-0.0858	0.7096	0.5915		-0.0911	±	0.229041	-0.185	0.0029	-0.265875	-0.539922	0.00846364	-0.3976	-0.7954	0.0113	0.3298		-0.0305	±	0.250626	-0.1333	0.0723	-0.0890141	-0.389036	0.211007	-0.1217	-0.5091	0.2693	1
Standing recording
HR (bpm)
single-day	83.8222	±	13.4361	75.9	±	10.7332	80.3056	±	12.5667		-7.9222	±	10.702	-12.3104	-3.5341	-0.56322	-0.875194	-0.251253	-0.7403	-1.1705	-0.2913	0.0179		4.4056	±	10.0686	0.2772	8.534	0.313211	0.0197072	0.606715	0.4376	0.0249	0.8381	0.2424		-3.5167	±	8.66075	-7.0678	0.0345	-0.250016	-0.502477	0.00245274	-0.406	-0.8044	0.0036	0.3092
2-day avg	84.2056	±	13.2581	76.05	±	9.8857	79.7444	±	13.0864		-8.1556	±	7.71433	-11.3187	-4.9925	-0.587597	-0.815493	-0.359701	-1.0572	-1.5329	-0.5574	< .001		3.6944	±	8.55044	0.1885	7.2004	0.266175	0.0135811	0.518777	0.4321	0.02	0.8322	0.2531		-4.4611	±	9.0928	-8.1894	-0.7328	-0.321415	-0.590033	-0.052797	-0.4906	-0.8952	-0.0726	0.1584
3-day avg	84.1222	±	13.3135	76.3	±	9.742	78.6833	±	12.2195		-7.8222	±	8.57552	-11.3384	-4.306	-0.561231	-0.813513	-0.308949	-0.9122	-1.3655	-0.437	0.0037		2.3833	±	6.54893	-0.3019	5.0686	0.170998	-0.0216609	0.363665	0.3639	-0.042	0.7597	0.423		-5.4389	±	9.25057	-9.2319	-1.6459	-0.390233	-0.662375	-0.118091	-0.588	-1.0013	-0.159	0.0696
4-day avg	83.5778	±	12.9714	76.7889	±	9.4982	78.0056	±	11.3409		-6.7889	±	8.51482	-10.2802	-3.2976	-0.49994	-0.757042	-0.242838	-0.7973	-1.2347	-0.34	0.0106		1.2167	±	5.53887	-1.0544	3.4878	0.0895987	-0.0776468	0.256844	0.2197	-0.176	0.609	1		-5.5722	±	8.79029	-9.1765	-1.9679	-0.410341	-0.675765	-0.144918	-0.6339	-1.052	-0.1992	0.0465
Ln RMSSD (ms)
single-day	3.1951	±	0.5897	3.4825	±	0.5692	3.3578	±	0.5299		0.2874	±	0.360055	0.1398	0.4351	0.465544	0.226455	0.704796	0.7983	0.3409	1.2359	0.0105		-0.1247	±	0.361668	-0.273	0.0236	-0.201995	-0.442218	0.0382284	-0.3449	-0.7395	0.0595	0.4851		0.1627	±	0.388454	0.0034	0.322	0.263549	0.00550748	0.521591	0.4189	0.008	0.8181	0.2803
2-day avg	3.1629	±	0.631	3.4371	±	0.5083	3.3429	±	0.5271		0.2741	±	0.349748	0.1307	0.4175	0.41494	0.197857	0.632022	0.7837	0.3285	1.2194	0.012		-0.0942	±	0.391117	-0.2545	0.0662	-0.142602	-0.385269	0.100215	-0.2408	-0.6308	0.1562	0.964		0.1799	±	0.424093	0.0061	0.3538	0.272337	0.00923434	0.535591	0.4243	0.0129	0.8239	0.2688
3-day avg	3.1549	±	0.6438	3.435	±	0.4904	3.3617	±	0.5201		0.2801	±	0.383499	0.1229	0.4374	0.415592	0.18235	0.648982	0.7304	0.2828	1.1594	0.0196		-0.0733	±	0.286603	-0.1908	0.0442	-0.108757	-0.283095	0.0655808	-0.2559	-0.6465	0.1421	0.8785		0.2068	±	0.426021	0.0321	0.3815	0.306835	0.0476277	0.566042	0.4854	0.0679	0.8896	0.1654
4-day avg	3.1764	±	0.6415	3.4303	±	0.4898	3.392	±	0.5195		0.2538	±	0.36945	0.1023	0.4053	0.37792	0.15233	0.603511	0.6871	0.2454	1.111	0.029		-0.0383	±	0.23831	-0.136	0.0594	-0.0570305	-0.20251	0.0884494	-0.1606	-0.5486	0.232	1		0.2156	±	0.404957	0.0495	0.3816	0.321039	0.0737078	0.56822	0.5323	0.1098	0.9405	0.1121
Ln RMSSD/RR (x10³)
single-day	4.3142	±	0.557	4.2759	±	0.4829	4.3693	±	0.5566		-0.0382	±	0.392601	-0.1992	0.1228	-0.0655109	-0.341617	0.210595	-0.0974	-0.4846	0.2927	1		0.0933	±	0.414254	-0.0765	0.2632	0.160004	-0.131193	0.451373	0.2253	-0.1707	0.6149	1		0.0551	±	0.221933	-0.0359	0.1461	0.0944934	-0.0615665	0.250553	0.2483	-0.1491	0.6386	0.9205
2-day avg	4.2799	±	0.608	4.2361	±	0.3971	4.3029	±	0.4748		-0.0438	±	0.3973	-0.2067	0.1191	-0.0688138	-0.324745	0.187117	-0.1102	-0.4975	0.2803	1		0.0668	±	0.330284	-0.0686	0.2022	0.104949	-0.107777	0.317675	0.2022	-0.1925	0.5911	1		0.023	±	0.232015	-0.0721	0.1181	0.0361351	-0.113276	0.185546	0.0991	-0.291	0.4864	1
3-day avg	4.253	±	0.6469	4.2491	±	0.3514	4.2704	±	0.45		-0.0039	±	0.410808	-0.1724	0.1645	-0.00575881	-0.254569	0.242904	-0.0096	-0.3972	0.3782	1		0.0213	±	0.246261	-0.0796	0.1223	0.031452	-0.117539	0.18059	0.0866	-0.3031	0.4738	1		0.0174	±	0.27166	-0.094	0.1288	0.0256931	-0.138802	0.190188	0.064	-0.325	0.4512	1
4-day avg	4.2499	±	0.6247	4.2681	±	0.3492	4.2719	±	0.4367		0.0181	±	0.371241	-0.1341	0.1703	0.0276766	-0.205051	0.260404	0.0488	-0.3399	0.436	1		0.0038	±	0.206362	-0.0808	0.0884	0.00581055	-0.123551	0.135172	0.0186	-0.3694	0.406	1		0.0219	±	0.272734	-0.0899	0.1338	0.0334871	-0.137465	0.204593	0.0805	-0.3091	0.4676	1
Data are shown as mean ± SD and 90% confidence limits. RSA: mean peak velocity of the repeated sprint ability test, VIFT: peak running speed of the 30-15 Intermittent Fitness Test, HR: heart rate, Ln RMSSD: natural logarithm of root mean square of successive differences between adjacent beat to beat intervals, Ln RMSSD/RR: Ln RMSSD to R-R interval ratio.
dpre: standardized mean difference using sample-size adjusted, between-subject SD at Pre, ddiff: standardized mean difference using SD of differences, pbonf: Bonferroni adjusted p-vales, 90% CL: 90% condifence limits, LL: lower limit, UL: upper limit.
[truncated: 3 more columns]

## Sheet: S-Tab3_r_perfom-HR(V)_ST
Supplementary Table 3
Correlations between performance and heart rate (variability) measures for percentage changes from Pre to Post1 and from Post 1 to Post4 in the strength training microcycle. Heart rate (variability) measures are provided as single-day values and 2–4-day rolling averages.
	1RM Squat										MVIC Squat										1RM Bench press										MVIC Bench press
	∆ Pre to Post1					∆ Post1 to Post4					∆ Pre to Post1					∆ Post1 to Post4					∆ Pre to Post1					∆ Post1 to Post4					∆ Pre to Post1					∆ Post1 to Post4
	r	90% CL		p		r	90% CL		p		r	90% CL		p		r	90% CL		p		r	90% CL		p		r	90% CL		p		r	90% CL		p		r	90% CL		p
		LL	UL				LL	UL				LL	UL				LL	UL				LL	UL				LL	UL				LL	UL				LL	UL
Supine recording
HR (bpm)
single-day	0.0155	-0.3763	0.4026	0.9498		-0.0739	-0.4504	0.325	0.7637		0.666	0.3734	0.8381	0.0019		0.0475	-0.3484	0.4291	0.8469		-0.3829	-0.6722	0.0077	0.1056		0.1508	-0.2536	0.5103	0.5378		-0.0071	-0.3955	0.3835	0.9771		0.1528	-0.2517	0.5118	0.5323
2-day avg	-0.0292	-0.414	0.3644	0.9055		-0.1163	-0.4838	0.2862	0.6355		0.747	0.5042	0.8803	< .001		0.0141	-0.3775	0.4014	0.9542		-0.4694	-0.7261	-0.0977	0.0426		-0.0882	-0.4618	0.3121	0.7197		-0.0105	-0.3984	0.3805	0.9659		0.152	-0.2524	0.5112	0.5345
3-day avg	-0.0218	-0.4079	0.3708	0.9293		-0.1101	-0.4791	0.2919	0.6537		0.7148	0.4509	0.8638	< .001		0.0456	-0.3501	0.4275	0.8528		-0.342	-0.6455	0.0549	0.1519		0.1853	-0.2201	0.5361	0.4475		0.0202	-0.3722	0.4065	0.9346		0.352	-0.0435	0.6521	0.1394
4-day avg	-0.1413	-0.5031	0.2627	0.5641		-0.1466	-0.5071	0.2576	0.5493		0.669	0.3781	0.8397	0.0017		0.0907	-0.3097	0.4639	0.7118		-0.2801	-0.6037	0.1228	0.2455		0.4447	0.0668	0.7111	0.0564		-0.0252	-0.4107	0.3679	0.9183		0.3422	-0.0546	0.6456	0.1516
Ln RMSSD (ms)
single-day	-0.1167	-0.4842	0.2858	0.6343		0.3383	-0.059	0.6431	0.1566		-0.0866	-0.4606	0.3135	0.7245		0.0309	-0.363	0.4154	0.9001		0.2563	-0.1479	0.5872	0.2894		0.0765	-0.3226	0.4525	0.7556		-0.1186	-0.4857	0.284	0.6287		-0.0403	-0.4231	0.3548	0.87
2-day avg	-0.1898	-0.5394	0.2157	0.4365		0.2731	-0.1303	0.5989	0.2579		-0.243	-0.5778	0.1618	0.3162		0.0859	-0.3141	0.46	0.7266		0.32	-0.0794	0.6309	0.1816		0.0984	-0.3027	0.4699	0.6884		-0.1007	-0.4717	0.3006	0.6817		-0.0549	-0.4351	0.3419	0.8232
3-day avg	-0.0772	-0.4531	0.322	0.7535		0.3399	-0.0571	0.6442	0.1544		-0.2327	-0.5705	0.1724	0.3376		0.0459	-0.3498	0.4278	0.8519		0.2207	-0.1847	0.5619	0.3639		-0.0579	-0.4375	0.3393	0.814		-0.1846	-0.5356	0.2208	0.4494		-0.2439	-0.5784	0.1609	0.3144
4-day avg	0.4197	0.0361	0.6955	0.0737		0.4664	0.094	0.7243	0.0441		-0.169	-0.524	0.2361	0.4893		0.0204	-0.3721	0.4067	0.934		0.0774	-0.3218	0.4533	0.7527		-0.2421	-0.5771	0.1628	0.3181		-0.2216	-0.5626	0.1837	0.3618		-0.2829	-0.6057	0.1198	0.2405
Ln RMSSD/RR (x10³)
single-day	-0.0439	-0.4261	0.3517	0.8585		0.4179	0.0339	0.6944	0.075		0.6478	0.3455	0.8283	0.0027		0.1398	-0.2641	0.5019	0.5682		-0.234	-0.5714	0.1711	0.335		0.319	-0.0805	0.6302	0.1832		-0.1624	-0.5191	0.2425	0.5066		0.1925	-0.213	0.5414	0.4297
2-day avg	-0.1665	-0.5221	0.2385	0.4958		0.2095	-0.196	0.5538	0.3894		0.6413	0.3357	0.8248	0.0031		0.1609	-0.2439	0.518	0.5105		-0.2899	-0.6104	0.1123	0.2287		0.0156	-0.3762	0.4027	0.9494		-0.128	-0.4929	0.2752	0.6016		0.1469	-0.2573	0.5074	0.5484
3-day avg	-0.099	-0.4703	0.3022	0.6868		0.3583	-0.0362	0.6562	0.132		0.6322	0.322	0.8198	0.0037		0.1141	-0.2882	0.4822	0.6419		-0.2053	-0.5508	0.2002	0.3991		0.0946	-0.3062	0.4669	0.7001		-0.1416	-0.5033	0.2624	0.5632		0.0463	-0.3495	0.4281	0.8507
4-day avg	0.1258	-0.2773	0.4912	0.6078		0.322	-0.0772	0.6322	0.1788		0.5821	0.2491	0.792	0.0089		0.0494	-0.3468	0.4306	0.8409		-0.23	-0.5686	0.1752	0.3434		0.077	-0.3222	0.4529	0.7541		-0.1825	-0.5341	0.2228	0.4545		-0.0105	-0.3984	0.3806	0.9659
Standing recording
HR (bpm)
single-day	-0.058	-0.4376	0.3391	0.8134		-0.1765	-0.5296	0.2287	0.4697		0.3999	0.0123	0.683	0.0898		0.2202	-0.1852	0.5615	0.3651		-0.4045	-0.686	-0.0178	0.0858		0.045	-0.3506	0.427	0.8548		-0.0847	-0.4591	0.3152	0.7302		0.2488	-0.1558	0.5819	0.3043
2-day avg	-0.0327	-0.4169	0.3614	0.8942		-0.0545	-0.4347	0.3423	0.8247		0.414	0.0292	0.6919	0.078		0.1207	-0.282	0.4873	0.6225		-0.3825	-0.6719	0.0082	0.106		0.0133	-0.3782	0.4007	0.957		0.0053	-0.385	0.394	0.9828		0.1596	-0.2452	0.5169	0.5141
3-day avg	-0.1781	-0.5308	0.2272	0.4658		-0.076	-0.4521	0.3231	0.7571		0.4853	0.1182	0.7357	0.0352		0.1288	-0.2745	0.4935	0.5993		-0.1519	-0.5111	0.2526	0.5349		0.072	-0.3267	0.4489	0.7696		0.1294	-0.2739	0.494	0.5975		0.2603	-0.1438	0.59	0.2819
4-day avg	-0.2503	-0.5829	0.1543	0.3014		0.1018	-0.2996	0.4726	0.6784		0.4613	0.0875	0.7212	0.0468		0.0165	-0.3754	0.4034	0.9467		-0.2028	-0.5489	0.2027	0.4051		-0.0744	-0.4509	0.3245	0.762		0.1309	-0.2725	0.4952	0.5932		0.0766	-0.3226	0.4526	0.7554
Ln RMSSD (ms)
single-day	0.0783	-0.321	0.4539	0.7501		0.1041	-0.2975	0.4744	0.6715		-0.1211	-0.4876	0.2817	0.6216		-0.0436	-0.4259	0.3519	0.8593		0.5306	0.1778	0.7625	0.0194		-0.2101	-0.5542	0.1954	0.388		0.1642	-0.2407	0.5204	0.5018		-0.1747	-0.5283	0.2305	0.4744
2-day avg	-0.0072	-0.3956	0.3834	0.9768		0.1054	-0.2963	0.4754	0.6677		-0.1364	-0.4993	0.2673	0.5777		-0.0608	-0.4399	0.3367	0.8048		0.3329	-0.0651	0.6395	0.1638		-0.1928	-0.5416	0.2127	0.4291		0.1225	-0.2804	0.4887	0.6174		-0.1112	-0.4799	0.2909	0.6503
3-day avg	0.1454	-0.2587	0.5063	0.5525		0.1484	-0.2559	0.5085	0.5442		0.0611	-0.3365	0.4401	0.8039		-0.0153	-0.4024	0.3765	0.9505		0.01	-0.381	0.398	0.9676		-0.2604	-0.5901	0.1437	0.2816		0.0151	-0.3767	0.4022	0.9512		-0.2859	-0.6077	0.1166	0.2354
4-day avg	0.199	-0.2065	0.5461	0.4141		-0.0144	-0.4017	0.3772	0.9533		0.109	-0.2929	0.4782	0.6568		0.1093	-0.2926	0.4785	0.6559		0.098	-0.3031	0.4696	0.6899		-0.0677	-0.4455	0.3305	0.7829		0.1724	-0.2327	0.5266	0.4803		-0.0685	-0.4461	0.3298	0.7804
Ln RMSSD/RR (x10³)
single-day	0.0729	-0.3258	0.4497	0.7667		-0.1171	-0.4845	0.2855	0.6332		0.3992	0.0114	0.6825	0.0905		0.2465	-0.1581	0.5803	0.3089		-0.0318	-0.4161	0.3622	0.8973		-0.16	-0.5172	0.2448	0.513		-0.0114	-0.3991	0.3798	0.9631		0.0668	-0.3313	0.4448	0.7858
2-day avg	0.0044	-0.3858	0.3932	0.9857		0.0393	-0.3557	0.4223	0.8732		0.3959	0.0075	0.6804	0.0934		0.0926	-0.308	0.4653	0.706		-0.1844	-0.5354	0.221	0.4498		-0.2363	-0.573	0.1688	0.3301		0.1095	-0.2925	0.4786	0.6556		0.0438	-0.3517	0.426	0.8587
3-day avg	-0.0374	-0.4208	0.3573	0.8792		0.0671	-0.3311	0.4449	0.785		0.6069	0.2847	0.8059	0.0059		0.1147	-0.2877	0.4826	0.6402		-0.128	-0.4929	0.2752	0.6015		-0.2221	-0.5629	0.1832	0.3608		0.2128	-0.1926	0.5562	0.3817		-0.0876	-0.4613	0.3126	0.7215
4-day avg	-0.0874	-0.4612	0.3128	0.7221		0.0842	-0.3157	0.4586	0.7319		0.5524	0.2076	0.7751	0.0142		0.1316	-0.2718	0.4957	0.5912		-0.0875	-0.4613	0.3127	0.7218		-0.1899	-0.5395	0.2155	0.4361		0.3198	-0.0796	0.6308	0.1819		-0.0486	-0.43	0.3475	0.8433
Data are pearson correlation and 90% confidence limits. 1RM: estimated one repetition maximum, MVIC: maximum voluntary isometric contraction, HR: heart rate, Ln RMSSD: natural logarithm of root mean square of successive differences between adjacent beat to beat intervals, Ln RMSSD/RR: Ln RMSSD to R-R interval ratio.

## Sheet: S-Tab4_r_perform-HR(V)_HIIT
Supplementary Table 4
Correlations between performance and heart rate (variability) measures for percentage changes from Pre to Post1 and from Post 1 to Post4 in the high-intensity interval training microcycle. Heart rate (variability) measures are provided as single-day values and 2–4-day rolling averages.
	RSA										VIFT
	∆ Pre to Post1					∆ Post1 to Post4					∆ Pre to Post1					∆ Post1 to Post4
	r	90% CL		p		r	90% CL		p		r	90% CL		p		r	90% CL		p
		LL	UL				LL	UL				LL	UL				LL	UL
Supine recording
HR (bpm)
single-day	-0.0833	-0.4685	0.3286	0.7426		-0.2697	-0.6052	0.1471	0.2791		-0.0499	-0.4419	0.3581	0.8441		-0.0203	-0.4178	0.3837	0.9363
2-day avg	-0.0993	-0.4811	0.3141	0.6949		-0.0722	-0.4597	0.3385	0.776		0.0184	-0.3853	0.4162	0.9422		-0.1966	-0.5538	0.2218	0.4343
3-day avg	-0.0533	-0.4447	0.3552	0.8337		-0.2184	-0.5694	0.2	0.384		-0.1521	-0.5212	0.265	0.5469		-0.2343	-0.5806	0.1839	0.3494
4-day avg	-0.0374	-0.4318	0.369	0.883		-0.1177	-0.4952	0.2972	0.6418		-0.0674	-0.4559	0.3428	0.7905		-0.326	-0.6429	0.0861	0.1867
Ln RMSSD (ms)
single-day	-0.0524	-0.444	0.3559	0.8364		0.0173	-0.3862	0.4153	0.9455		-0.0987	-0.4806	0.3146	0.6968		0.3138	-0.0996	0.6349	0.2047
2-day avg	-0.0298	-0.4256	0.3756	0.9065		-0.1792	-0.5412	0.2388	0.4768		-0.0958	-0.4783	0.3172	0.7052		-0.0716	-0.4593	0.339	0.7777
3-day avg	-0.0413	-0.435	0.3656	0.8707		-0.0741	-0.4613	0.3368	0.77		0.0409	-0.366	0.4346	0.8721		0.0401	-0.3667	0.434	0.8746
4-day avg	0.0403	-0.3665	0.4341	0.8739		-0.1389	-0.5113	0.2774	0.5825		0.2139	-0.2045	0.5663	0.394		-0.2515	-0.5926	0.1662	0.3142
Ln RMSSD/RR (x10³)
single-day	-0.1071	-0.487	0.307	0.6724		0.1406	-0.2758	0.5126	0.5779		-0.1088	-0.4884	0.3054	0.6675		-0.6137	-0.8142	-0.2822	0.0068
2-day avg	-0.113	-0.4916	0.3015	0.6552		0.0584	-0.3507	0.4488	0.8179		-0.0874	-0.4717	0.3249	0.7303		-0.5821	-0.797	-0.2364	0.0113
3-day avg	-0.1075	-0.4873	0.3066	0.6713		0.1721	-0.2457	0.536	0.4947		-0.1312	-0.5055	0.2847	0.6039		-0.5097	-0.7561	-0.1368	0.0307
4-day avg	-0.0546	-0.4457	0.354	0.8296		0.3494	-0.0599	0.6581	0.1553		0.027	-0.3779	0.4233	0.9152		-0.2597	-0.5983	0.1576	0.298
Standing recording
HR (bpm)
single-day	0.0243	-0.3803	0.4211	0.9237		0.3233	-0.0891	0.6411	0.1906		-0.1707	-0.535	0.2471	0.4982		0.1692	-0.2486	0.5338	0.5022
2-day avg	0.1672	-0.2504	0.5324	0.5072		0.4772	0.0944	0.7371	0.0452		-0.1742	-0.5375	0.2437	0.4893		0.0482	-0.3596	0.4406	0.8494
3-day avg	0.2319	-0.1863	0.579	0.3545		0.4115	0.0127	0.6974	0.0897		-0.1333	-0.5071	0.2827	0.5981		-0.1032	-0.4841	0.3105	0.6836
4-day avg	0.1914	-0.2268	0.5501	0.4467		0.4152	0.0172	0.6996	0.0866		-0.0835	-0.4687	0.3283	0.7418		-0.1468	-0.5173	0.2699	0.561
Ln RMSSD (ms)
single-day	0.0506	-0.3576	0.4425	0.8421		-0.3092	-0.6318	0.1047	0.2119		0.2409	-0.1771	0.5853	0.3356		-0.0769	-0.4635	0.3343	0.7618
2-day avg	-0.1399	-0.5121	0.2765	0.5797		-0.4502	-0.721	-0.0602	0.0608		-0.0108	-0.4099	0.3918	0.966		0.2514	-0.1662	0.5926	0.3142
3-day avg	-0.1917	-0.5503	0.2266	0.446		-0.2443	-0.5876	0.1736	0.3286		-0.0655	-0.4545	0.3444	0.7961		0.4318	0.0373	0.7098	0.0736
4-day avg	-0.1272	-0.5025	0.2884	0.6149		-0.1839	-0.5446	0.2342	0.4651		-0.0851	-0.47	0.3269	0.737		0.4902	0.1112	0.7448	0.0389
Ln RMSSD/RR (x10³)
single-day	0.1219	-0.2933	0.4984	0.6299		0.1217	-0.2935	0.4983	0.6304		-0.078	-0.4644	0.3333	0.7584		0.1505	-0.2664	0.52	0.551
2-day avg	-0.006	-0.4059	0.3958	0.981		-0.0169	-0.4149	0.3866	0.9471		-0.195	-0.5527	0.2233	0.438		0.4954	0.118	0.7478	0.0366
3-day avg	-0.0629	-0.4524	0.3467	0.8042		0.2576	-0.1598	0.5969	0.302		-0.2109	-0.5641	0.2075	0.4008		0.4762	0.0931	0.7365	0.0458
4-day avg	0.0149	-0.3883	0.4133	0.9531		0.325	-0.0873	0.6422	0.1882		-0.2238	-0.5733	0.1945	0.3719		0.4806	0.0988	0.7391	0.0435
Data are pearson correlation and 90% confidence limits. RSA: mean peak velocity of the repeated sprint ability test, VIFT: peak running speed of the 30-15 Intermittent Fitness Test, HR: heart rate, Ln RMSSD: natural logarithm of root mean square of successive differences between adjacent beat to beat intervals, Ln RMSSD/RR: Ln RMSSD to R-R interval ratio.

## Sheet: S-Tab5_3x3 tables_perform-HR(V)
Supplementary Table 5
3 x 3 tables for individual response classification of criterion performance and resting heart rate (variability) measures using single-day and 4-day average values
Strength training
	∆ Pre to Post1																			∆ Post1 to Post4
				Supine recordings								Standing recordings											Supine recordings								Standing recordings
				HR				Ln RMSSD				HR				Ln RMSSD							HR				Ln RMSSD				HR				Ln RMSSD
	1RM			-	o	+		-	o	+		-	o	+		-	o	+		1RM			-	o	+		-	o	+		-	o	+		-	o	+
single-day	-	10		2	3	5		5	4	1		3	3	4		5	3	2		-	1			1			1					1				1
	o	7			2	5		3	4			1	3	3		2	5			o	9		4	3	2		2	4	3		1	5	3		2	5	2
	+	2		1	1			1	1			1	1				2			+	9		4	3	2			5	4		3	4	2		2	5	2
				Supine recordings								Standing recordings											Supine recordings								Standing recordings
				HR				Ln RMSSD				HR				Ln RMSSD							HR				Ln RMSSD				HR				Ln RMSSD
	1RM			-	o	+		-	o	+		-	o	+		-	o	+		1RM			-	o	+		-	o	+		-	o	+		-	o	+
4-day average	-	10		1	3	6		4	6				8	2		2	8			-	1			1				1				1				1
	o	7			3	4		4	3				4	3		1	6			o	9	2	2	7				7	2		1	8				9
	+	2			2				2				2				2			+	9	1	1	8				8	1		1	6	2		1	6	2
High-intensity interval training
	∆ Pre to Post1																			∆ Post1 to Post4
				Supine recordings								Standing recordings											Supine recordings								Standing recordings
				HR				Ln RMSSD				HR				Ln RMSSD							HR				Ln RMSSD				HR				Ln RMSSD
	RSA			-	o	+		-	o	+		-	o	+		-	o	+		RSA			-	o	+		-	o	+		-	o	+		-	o	+
single-day	-	15		5	8	2		4	6	5		10	3	2		2	5	8		-	1			1				1				1				1
	o	3		2		1		1	2			2	1				2	1		o	8		3	3	2		1	5	2		3	2	3		3	4	1
	+																			+	9		4	4	1		3	4	2			4	5		4	4	1
				Supine recordings								Standing recordings											Supine recordings								Standing recordings
				HR				Ln RMSSD				HR				Ln RMSSD							HR				Ln RMSSD				HR				Ln RMSSD
	RSA			-	o	+		-	o	+		-	o	+		-	o	+		RSA			-	o	+		-	o	+		-	o	+		-	o	+
4-day average	-	15		1	9	5		3	10	2		8	6	1		2	5	8		-	1			1				1				1				1
	o	3		1	1	1		2		1		1	2				3			o	8		5	3				6	2		3	5				7	1
	+																			+	9		5	4			1	5	3			6	3		3	5	1
Data in the 3 x 3 tables represent the number of observed individual responses classified for 9 response types (3 response types for criterion and heart rate measures, respectively). HR: heart rate, Ln RMSSD: natural logarithm of root mean square of successive differences between adjacent beat to beat intervals, 1RM: one repetiton maximum in the squat, RSA: repeated sprint ability
-: observed reduction > typical error (TE), o: observed changes < TE, +: observed increase > TE. Group-based TE were used for criterion measures (see. Raeder et al., 2016, Wiewelhove et al., 2015) and individual TE was used for heart rate measures (individual SD during 4-day baseline period).

## Sheet: S-Tab6_3x3 tables_HR-HRV
Supplementary Table 6
3 x 3 tables for individual response classification of resting heart rate and Ln RMSSD using single-day and 4-day average values
Strength training
	∆ Pre to Post1										∆ Post1 to Post4
	Supine recordings					Standing recordings					Supine recordings					Standing recordings
		Ln RMSSD					Ln RMSSD					Ln RMSSD					Ln RMSSD
	HR	-	o	+		HR	-	o	+		HR	-	o	+		HR	-	o	+
single-day	-	1	2			-	1	2	2		-		1	7		-		1	3
	o	1	4	1		o	1	6			o	3	4			o	1	8	1
	+	7	3			+	5	2			+		4			+	3	2
	Supine recordings					Standing recordings					Supine recordings					Standing recordings
		Ln RMSSD					Ln RMSSD					Ln RMSSD					Ln RMSSD
	HR	-	o	+		HR	-	o	+		HR	-	o	+		HR	-	o	+
4-day average	-		1			-					-		1	2		-		2
	o	2	6			o	1	13			o		15	1		o		13	2
	+	6	4			+	2	3			+					+	1	1
High-intensity interval training
	∆ Pre to Post1										∆ Post1 to Post4
	Supine recordings					Standing recordings					Supine recordings					Standing recordings
		Ln RMSSD					Ln RMSSD					Ln RMSSD					Ln RMSSD
	HR	-	o	+		HR	-	o	+		HR	-	o	+		HR	-	o	+
single-day	-	4	1	2		-		4	8		-	1	5	1		-		2	1
	o		5	3		o		3	1		o	2	4	2		o	1	5	1
	+	1	2			+	2				+	1	1	1		+	6	2
	Supine recordings					Standing recordings					Supine recordings					Standing recordings
		Ln RMSSD					Ln RMSSD					Ln RMSSD					Ln RMSSD
	HR	-	o	+		HR	-	o	+		HR	-	o	+		HR	-	o	+
4-day average	-		1	1		-		2	7		-		5	5		-		3
	o	2	7	1		o	1	6	1		o	1	7			o	1	9	2
	+	3	2	1		+	1				+					+	2	1
Data in the 3 x 3 tables represent the number of observed individual responses classified for 9 response types (3 response types for heart rate and Ln RMSSD, respectively). HR: heart rate, Ln RMSSD: natural logarithm of root mean square of successive differences between adjacent beat to beat intervals.
-: observed reduction > typical error (TE), o: observed changes < TE, +: observed increase > TE. Individual TE was used for heart rate measures (individual SD during 4-day baseline period).

## Sheet: S-Tab7_r_HR-HRV
Supplementary Table 7
Correlations between heart rate and Ln RMSSD for percentage changes from Pre to Post1 and from Post 1 to Post4 and for individual time series. Analyzed are provided for single-day values and 2–4-day rolling averages.
	∆ Pre to Post1					∆ Post1 to Post4					Individual time series*
	r	90% CL		p		r	90% CL		p		r			Range
		LL	UL				LL	UL			mean		SD	Min	Max
Strength training
Supine recordings
single-day	-0.4868	-0.7367	-0.1201	0.0345		-0.7656	-0.8898	-0.536	< .001		-0.6739	±	0.2914	-0.9693	0.0913
2-day avg	-0.4874	-0.737	-0.1208	0.0343		-0.716	-0.8644	-0.4527	< .001		-0.6669	±	0.3631	-0.9799	0.3314
3-day avg	-0.5523	-0.7751	-0.2075	0.0142		-0.7453	-0.8795	-0.5013	< .001		-0.6653	±	0.4024	-0.9772	0.5232
4-day avg	-0.4138	-0.6918	-0.029	0.0782		-0.33	-0.6376	0.0683	0.1676		-0.6675	±	0.4139	-0.9807	0.4614
Standing recordings
single-day	-0.6217	-0.8141	-0.3064	0.0045		-0.7601	-0.887	-0.5265	< .001		-0.6316	±	0.2688	-0.9529	-0.0962
2-day avg	-0.5936	-0.7985	-0.2654	0.0074		-0.7745	-0.8943	-0.5514	< .001		-0.6719	±	0.2612	-0.9376	-0.0832
3-day avg	-0.508	-0.7493	-0.1478	0.0264		-0.6559	-0.8327	-0.3578	0.0023		-0.6356	±	0.2889	-0.9463	0.1186
4-day avg	-0.4187	-0.6949	-0.0349	0.0744		-0.6849	-0.8481	-0.4029	0.0012		-0.6081	±	0.3611	-0.9722	0.3554
High-intensity interval training
Supine recordings
single-day	-0.2444	-0.5877	0.1735	0.3284		-0.1659	-0.5314	0.2517	0.5106		-0.5561	±	0.3553	-0.9176	0.1307
2-day avg	-0.3388	-0.6512	0.0718	0.169		-0.3474	-0.6568	0.0622	0.1578		-0.543	±	0.3698	-0.9249	0.2139
3-day avg	-0.2576	-0.5969	0.1598	0.3021		-0.1885	-0.548	0.2297	0.4537		-0.5033	±	0.4146	-0.9466	0.412
4-day avg	-0.3413	-0.6529	0.069	0.1657		0.0579	-0.3511	0.4484	0.8195		-0.505	±	0.4529	-0.9643	0.5223
Standing recordings
single-day	-0.7406	-0.8802	-0.4832	< .001		-0.6891	-0.854	-0.3982	0.0016		-0.7657	±	0.1842	-0.9678	-0.2828
2-day avg	-0.5769	-0.7941	-0.2289	0.0122		-0.7627	-0.8911	-0.5211	< .001		-0.7791	±	0.2181	-0.9763	-0.3109
3-day avg	-0.6648	-0.8414	-0.3598	0.0026		-0.7484	-0.884	-0.4964	< .001		-0.7406	±	0.2856	-0.9828	-0.035
4-day avg	-0.6818	-0.8503	-0.3867	0.0018		-0.7439	-0.8818	-0.4887	< .001		-0.7478	±	0.3069	-0.9855	0.1436
Data are pearson correlation and 90% confidence limits. Ln RMSSD: natural logarithm of root mean square of successive differences between adjacent beat to beat intervals.
*Note: correlations for individual time series differed in the number of available data pairs (single-day: 14 pairs, 2-day average: 13 pairs, 3-day average: 12 pairs, 4-day average: 11 pairs)
